# Supplementary material
Source: publisher figshare collection journal article supplement (https://asha.figshare.com/ndownloader/files/27311324)
Supplement: Supplementary file 1 [file 27311324]

# Supplemental Material S1.

## Population Health SLP Questionnaire

For each of the following domains from the CPPH framework, indicate the level of **CURRENT** coverage within the entry-level SLP curriculum at your institution: **strong, moderate, minimal, none, or uncertain**. [Note: in the emailed invitation to participate in the study, the CPPH acronym was spelled out as Clinical Prevention and Population Health]

### Component 1: Foundations of Population Health

#### Domain 1.1: **Descriptive Epidemiology: The Health of Populations**

(Understand determinants of health, disease, and injury and their distribution [across groups of people, places, or time])

☐ Strong ☐ Moderate ☐ Minimal ☐ None ☐ Uncertain

#### Domain 1.2: **Etiology, Benefits and Harms; Health Research Evaluation**

(Assess study designs, understand statistical tests, evaluate data quality, interpret data)

☐ Strong ☐ Moderate ☐ Minimal ☐ None ☐ Uncertain

#### Domain 1.3: **Evidence-Based Practice**

(Assess quality of evidence, use nationally recognized practice guidelines)

☐ Strong ☐ Moderate ☐ Minimal ☐ None ☐ Uncertain

#### Domain 1.4: **Implementation of Health Promotion and Disease Prevention Interventions**

(Understand types of prevention, recognize social determinants of health, understand role of clinician and team in improving health of populations)

☐ Strong ☐ Moderate ☐ Minimal ☐ None ☐ Uncertain

#### Domain 1.5: **Determinants of Health**

(Recognize impact of social factors [for example, socioeconomic status], the environment, policy, and health care [for example, early detection, prenatal care] as determinants of health)

☐ Strong ☐ Moderate ☐ Minimal ☐ None ☐ Uncertain

#### Domain 1.6: **Population Health Informatics**

(Use population health data to assess population health and guide health care delivery, analyze health outcomes)

☐ Strong ☐ Moderate ☐ Minimal ☐ None ☐ Uncertain

#### Domain 1.7: **Evaluation**

(Knowledge of process and outcome assessments, decision analyses, and quality improvement processes to determine health outcomes, cost-effectiveness, and patient safety)

☐ Strong ☐ Moderate ☐ Minimal ☐ None ☐ Uncertain

## **Component 2: Clinical Preventive Services and Health Promotion**

### **Domain 2.1: Screening**

(Analyze screening tests, understand criteria for successful screening, use evidence-based screening measures)

☐ Strong ☐ Moderate ☐ Minimal ☐ None ☐ Uncertain

### **Domain 2.2: Counseling for Behavioral Change**

(Implement behavior change approaches that serve diverse patient/clients, use evidence-based recommendations for behavior change)

☐ Strong ☐ Moderate ☐ Minimal ☐ None ☐ Uncertain

### **Domain 2.3: Immunization**

(Understand approaches to vaccination, understand government requirements for vaccination)

☐ Strong ☐ Moderate ☐ Minimal ☐ None ☐ Uncertain

### **Domain 2.4: Preventive Medication**

(Understand chemoprevention [use of drugs, vitamins, supplements and other agents to prevent development of disease])

☐ Strong ☐ Moderate ☐ Minimal ☐ None ☐ Uncertain

### **Domain 2.5: Other Preventive Interventions**

(Identify and implement lifestyle interventions for varied groups, for example, diet, exercise, smoking cessation)

☐ Strong ☐ Moderate ☐ Minimal ☐ None ☐ Uncertain

## **Component 3: Clinical Practice and Population Health**

### **Domain 3.1: Incorporating Population Health into Clinical Care**

(Involve communities in health improvement initiatives, work effectively in healthcare team practice)

☐ Strong ☐ Moderate ☐ Minimal ☐ None ☐ Uncertain

### **Domain 3.2: Partnering with the Public to Improve Health**

(Implement community health assessments and interventions, contribute to community-engaged research, account for literacy level and cultural appropriateness in communications)

☐ Strong ☐ Moderate ☐ Minimal ☐ None ☐ Uncertain

### **Domain 3.3: Environmental Health**

(Understand scope of environmental health including the built environment, recognize and reduce environmental hazards to vulnerable individuals and populations)

☐ Strong ☐ Moderate ☐ Minimal ☐ None ☐ Uncertain

### **Domain 3.4: Occupational Health**

(Evaluate employment-based risks and injuries, prevent and control occupational injuries and exposures [for example, chemical, biologic, physical])

☐ Strong ☐ Moderate ☐ Minimal ☐ None ☐ Uncertain

**Domain 3.5: Global Health Issues**

(Understand role of key international global health organizations, understand patterns of disease in other countries and the effect of globalization on health)

☐ Strong ☐ Moderate ☐ Minimal ☐ None ☐ Uncertain

**Domain 3.6: Cultural Dimensions of Practice**

(Design and deliver culturally sensitive, patient-centered health care; recognize bias, prejudice and stereotyping)

☐ Strong ☐ Moderate ☐ Minimal ☐ None ☐ Uncertain

**Domain 3.7: Emergency Preparedness and Response Systems**

(Understand preparedness and response systems)

☐ Strong ☐ Moderate ☐ Minimal ☐ None ☐ Uncertain

**Component 4: Health Systems and Health Policy**

**Domain 4.1: Organization of Clinical and Public Health Systems**

(Understand continuum of health services including structure of public health systems and relationship between clinical practice and public health)

☐ Strong ☐ Moderate ☐ Minimal ☐ None ☐ Uncertain

**Domain 4.2: Health Services Financing**

(Understand insurance coverage and reimbursement, safety net provisions for those who are uninsured or underinsured, financing of healthcare institutions, and ethical principles of healthcare financing)

☐ Strong ☐ Moderate ☐ Minimal ☐ None ☐ Uncertain

**Domain 4.3: Clinical and Public Health Workforce**

(Understand how health professionals and institutions are regulated, participate in interprofessional teams, understand legal and ethical responsibilities of health professionals)

☐ Strong ☐ Moderate ☐ Minimal ☐ None ☐ Uncertain

**Domain 4.4: Health Policy Process**

(Understand health policy-making at local, state, and federal levels; understand ways to participate in the policy-making process)

☐ Strong ☐ Moderate ☐ Minimal ☐ None ☐ Uncertain

Now we are going to present you with the domains a second time. This time, for each domain, indicate your level of agreement as to whether the content **SHOULD** be included within an entry-level SLP curriculum: **strongly agree, agree, disagree, strongly disagree, uncertain.**

**Component 1: Foundations of Population Health**

**Domain 1.1: Descriptive Epidemiology: The Health of Populations**

(Understand determinants of health, disease, and injury and their distribution [across groups of people, places, or time])

☐ Strongly Agree ☐ Agree ☐ Disagree ☐ Strongly Disagree ☐ Uncertain

**Domain 1.2: Etiology, Benefits and Harms; Health Research Evaluation**

(Assess study designs, understand statistical tests, evaluate data quality, interpret data)

☐ Strongly Agree ☐ Agree ☐ Disagree ☐ Strongly Disagree ☐ Uncertain

**Domain 1.3: Evidence-Based Practice**

(Assess quality of evidence, use nationally recognized practice guidelines)

☐ Strongly Agree ☐ Agree ☐ Disagree ☐ Strongly Disagree ☐ Uncertain

**Domain 1.4: Implementation of Health Promotion and Disease Prevention Interventions**

(Understand types of prevention, recognize social determinants of health, understand role of clinician and team in improving health of populations)

☐ Strongly Agree ☐ Agree ☐ Disagree ☐ Strongly Disagree ☐ Uncertain

**Domain 1.5: Determinants of Health**

(Recognize impact of social factors [for example, socioeconomic status], the environment, policy, and health care [for example, early detection, prenatal care] as determinants of health)

☐ Strongly Agree ☐ Agree ☐ Disagree ☐ Strongly Disagree ☐ Uncertain

**Domain 1.6: Population Health Informatics**

(Use population health data to assess population health and guide health care delivery, analyze health outcomes)

☐ Strongly Agree ☐ Agree ☐ Disagree ☐ Strongly Disagree ☐ Uncertain

**Domain 1.7: Evaluation**

(Knowledge of process and outcome assessments, decision analyses, and quality improvement processes to determine health outcomes, cost-effectiveness, and patient safety)

☐ Strongly Agree ☐ Agree ☐ Disagree ☐ Strongly Disagree ☐ Uncertain

**Component 2: Clinical Preventive Services and Health Promotion**

**Domain 2.1: Screening**

(Analyze screening tests, understand criteria for successful screening, use evidence-based screening measures)

☐ Strongly Agree ☐ Agree ☐ Disagree ☐ Strongly Disagree ☐ Uncertain

**Domain 2.2: Counseling for Behavioral Change**

(Implement behavior change approaches that serve diverse patient/clients, use evidence-based recommendations for behavior change)

☐ Strongly Agree ☐ Agree ☐ Disagree ☐ Strongly Disagree ☐ Uncertain

**Domain 2.3: Immunization**

(Understand approaches to vaccination, understand government requirements for vaccination)

☐ Strongly Agree ☐ Agree ☐ Disagree ☐ Strongly Disagree ☐ Uncertain

**Domain 2.4: Preventive Medication**

(Understand chemoprevention [use of drugs, vitamins, supplements and other agents to prevent development of disease])

☐ Strongly Agree ☐ Agree ☐ Disagree ☐ Strongly Disagree ☐ Uncertain

**Domain 2.5: Other Preventive Interventions**

(Identify and implement lifestyle interventions for varied groups, for example, diet, exercise, smoking cessation)

☐ Strongly Agree ☐ Agree ☐ Disagree ☐ Strongly Disagree ☐ Uncertain

**Component 3: Clinical Practice and Population Health**

**Domain 3.1: Incorporating Population Health into Clinical Care**

(Involve communities in health improvement initiatives, work effectively in healthcare team practice)

☐ Strongly Agree ☐ Agree ☐ Disagree ☐ Strongly Disagree ☐ Uncertain

**Domain 3.2: Partnering with the Public to Improve Health**

(Implement community health assessments and interventions, contribute to community-engaged research, account for literacy level and cultural appropriateness in communications)

☐ Strongly Agree ☐ Agree ☐ Disagree ☐ Strongly Disagree ☐ Uncertain

**Domain 3.3: Environmental Health**

(Understand scope of environmental health including the built environment, recognize and reduce environmental hazards to vulnerable individuals and populations)

☐ Strongly Agree ☐ Agree ☐ Disagree ☐ Strongly Disagree ☐ Uncertain

**Domain 3.4: Occupational Health**

(Evaluate employment-based risks and injuries, prevent and control occupational injuries and exposures [for example, chemical, biologic, physical])

☐ Strongly Agree ☐ Agree ☐ Disagree ☐ Strongly Disagree ☐ Uncertain

**Domain 3.5: Global Health Issues**

(Understand role of key international global health organizations, understand patterns of disease in other countries and the effect of globalization on health)

☐ Strongly Agree ☐ Agree ☐ Disagree ☐ Strongly Disagree ☐ Uncertain

**Domain 3.6: Cultural Dimensions of Practice**

(Design and deliver culturally sensitive, patient-centered health care; recognize bias, prejudice and stereotyping)

☐ Strongly Agree ☐ Agree ☐ Disagree ☐ Strongly Disagree ☐ Uncertain

**Domain 3.7: Emergency Preparedness and Response Systems**

(Understand preparedness and response systems)

☐ Strongly Agree ☐ Agree ☐ Disagree ☐ Strongly Disagree ☐ Uncertain

**Component 4: Health Systems and Health Policy**

**Domain 4.1: Organization of Clinical and Public Health Systems**

(Understand continuum of health services including structure of public health systems and relationship between clinical practice and public health)

☐ Strongly Agree ☐ Agree ☐ Disagree ☐ Strongly Disagree ☐ Uncertain

**Domain 4.2: Health Services Financing**

(Understand insurance coverage and reimbursement, safety net provisions for those who are uninsured or underinsured, financing of healthcare institutions, and ethical principles of healthcare financing)

- ☐ Strongly Agree   ☐ Agree   ☐ Disagree   ☐ Strongly Disagree   ☐ Uncertain

**Domain 4.3: Clinical and Public Health Workforce**

(Understand how health professionals and institutions are regulated, participate in interprofessional teams, understand legal and ethical responsibilities of health professionals)

- ☐ Strongly Agree   ☐ Agree   ☐ Disagree   ☐ Strongly Disagree   ☐ Uncertain

**Domain 4.4: Health Policy Process**

(Understand health policy-making at local, state, and federal levels; understand ways to participate in the policy-making process)

- ☐ Strongly Agree   ☐ Agree   ☐ Disagree   ☐ Strongly Disagree   ☐ Uncertain

Indicate the geographic region (based on US census divisions) in which your program is located. Locations outside US census divisions are grouped with the closest region.

- ☐ Pacific (AK, CA, HI, OR, WA)  
☐ Mountain (AZ, CO, ID, MT, NM, NV, UT, WY)  
☐ West North Central (IA, KS, MN, MO, ND, NE, SD)  
☐ East North Central (IL, IN, MI, OH, WI)  
☐ West South Central (AR, LA, OK, TX)  
☐ East South Central (AL, KY, MS, TN)  
☐ South Atlantic (DC, DE, FL, GA, MD, NC, PR, SC, VA, WV)  
☐ Middle Atlantic (NJ, NY, PA)  
☐ New England (CT, MA, ME, NH, RI, VT)

Please indicate the choice that most closely matches your program's curriculum approach to population health content.

- ☐ Population health content is concentrated in one or more courses.  
☐ Population health content is purposefully threaded across the curriculum.  
☐ Population health content is an informal element of the curriculum.

Please provide any additional input related to the population health content of SLP programs.

---

---

---

---

---
